# Supplementary material for: Chronic and Gradual-Onset Injuries and Conditions in the Sport of Surfing: A Systematic Review
Source: Sports (Basel). 2021 Jan 29;9(2):23. doi: 10.3390/sports9020023 (PMC7911480; doi:10.3390/sports9020023)
Supplement: Supplementary file 1 [file sports-09-00023-s001.pdf]

## Supplementary Material

*Table S1 – Modified AXIS Critical Appraisal Tool*

|                      | Question                                                                                                                                              | Yes = 1 or 2 | No = 0 | Not Applicable<br>(Comment) |
|----------------------|-------------------------------------------------------------------------------------------------------------------------------------------------------|--------------|--------|-----------------------------|
| <b>Introduction</b>  |                                                                                                                                                       |              |        |                             |
| 1                    | Were the aims/objectives of the study clear?                                                                                                          |              |        |                             |
| <b>Methods</b>       |                                                                                                                                                       |              |        |                             |
| 2                    | Was the study design appropriate for the stated aim(s)?                                                                                               |              |        |                             |
| 3                    | Was the sample size justified?                                                                                                                        |              |        |                             |
| 4                    | Was the target reference population clearly defined? (Is it clear who the research was about?)                                                        |              |        |                             |
| 5                    | Was the sample frame taken from an appropriate population base so that it closely represented the target/reference population under investigation?    |              |        |                             |
| 6                    | Was the selection process likely to select subjects or participants that were representative of the target/reference population under investigation?  |              |        |                             |
| 7                    | Were measures undertaken to address and categorise non-responders?                                                                                    |              |        |                             |
| 8                    | Were the risk factor and outcome variables measured appropriate for the aims of the study?                                                            |              |        |                             |
| 9                    | Were the risk factor and outcome variables measured correctly using instruments/measurements that has been trialled, piloted or published previously? |              |        |                             |
| 10                   | Is it clear what was used to determine statistical significance and/or precision estimate? (e.g. p-values, confidence intervals)                      |              |        |                             |
| 11                   | Were the methods (including statistical methods) sufficiently described to enable them to be repeated?                                                |              |        |                             |
| *12                  | Do the authors define their interpretation of injury? (e.g. chronic, gradual-onset or non-musculoskeletal conditions)                                 |              |        |                             |
| 13                   | Was an appropriate criteria for injury severity used?                                                                                                 |              |        |                             |
| 14                   | Was injury data collected objectively? (Score = 2)                                                                                                    |              |        |                             |
| *                    | OR                                                                                                                                                    |              |        |                             |
|                      | Was injury data collected via self-reporting? (Score = 1)                                                                                             |              |        |                             |
| *15                  | If appropriate, was the mechanism of the injury recorded?                                                                                             |              |        |                             |
| <b>Results</b>       |                                                                                                                                                       |              |        |                             |
| 16                   | Were the basic data adequately described?                                                                                                             |              |        |                             |
| *17                  | Are there no concerns about non-response bias?                                                                                                        |              |        |                             |
| 18                   | If appropriate, was information about non-responders described?                                                                                       |              |        |                             |
| 19                   | Were the results internally consistent?                                                                                                               |              |        |                             |
| 20                   | Were the results presented for all the analyses described in the methods?                                                                             |              |        |                             |
| <b>Discussion</b>    |                                                                                                                                                       |              |        |                             |
| 21                   | Were the authors' discussions and conclusions justified by the results?                                                                               |              |        |                             |
| 22                   | Were the limitations of the study discussed?                                                                                                          |              |        |                             |
| <b>Other</b>         |                                                                                                                                                       |              |        |                             |
| *23                  | Was there an absence of any funding sources or conflicts of interest that may affect the authors' interpretation of the results?                      |              |        |                             |
| 24                   | Was ethical approval or consent of participants obtained?                                                                                             |              |        |                             |
| <b>TOTAL SCORE =</b> |                                                                                                                                                       |              |        |                             |

Key: \*Modified questions as per the Method section.

*Table S2 – Categorisation for Body Location of Musculoskeletal Injuries*

| <b>Category of Body Location</b> | <b>Inclusive of</b>                                     |
|----------------------------------|---------------------------------------------------------|
| Head/Face/Neck                   | Head/Face[10,24]; Neck[10,11,24]; Head/Neck[35]         |
| Shoulder                         | Shoulder[10,11,24,29,35]                                |
| Upper Limb                       | Arm[10]; Forearm[35]; Elbow[11,24,29]; Wrist/Hand[24]   |
| Torso                            | Ribs[11]; Ribs/Sternum[10]; Chest/Back[35]              |
| Spine/Back                       | Back[11,29]; Thoracic[10,24]; Lower Back[10,23,24,35]   |
| Hip/Groin                        | Hip/Groin[10,24]                                        |
| Knee                             | Knee[10,24]                                             |
| Lower Limb                       | Lower Limb[35]; Shin/Calf[24]; Leg/Ankle[10]; Ankle[24] |
| Other                            | Other[11,29]                                            |

*Table S3 – Categorisation for Mechanism of Musculoskeletal Injuries*

| Category of Mechanism            | Inclusive of                                                                                                                 |
|----------------------------------|------------------------------------------------------------------------------------------------------------------------------|
| Paddling                         | Prolonged Paddling[24]; High Intensity Paddling[24]; Keeping Head Up While Paddling[24]; Overuse Paddling[4,5]; Paddling[10] |
| Manoeuvre                        | Turning Manoeuvres[24]; Landing Aerials[24]; Stress from Manoeuvre[4,5]                                                      |
| Overuse of Joint                 | Overuse of Joint[11]                                                                                                         |
| Riding the Wave                  | Stand-Up Phase[24]; Pushing Down to Stand Up[24]; Tube Riding[24]; Trauma from Wave[24]; Riding Wave[10]                     |
| Prolonged Environmental Exposure | Prolonged Environmental Exposure[24]                                                                                         |
| Prolonged Positioning on Board   | Prolonged Lying on Surfboard[24]; Prolonged Sitting on Surfboard[24]                                                         |
| Duck Diving                      | Duck Diving[24]                                                                                                              |
| Certain Stances                  | Certain Stances[24]                                                                                                          |
| Other                            | Miscellaneous[10]; Other[11]; Rib Inflammation[11]                                                                           |
| Unknown                          | Unknown[10,24]                                                                                                               |

**Table S4 – Injury Epidemiology Specific to Injury Type, Location, Mechanism, & Severity**

| Author (year)      | Type of Injury                                                                                                                                                                                                                                                                            | Body Region                                                                                                                                                                           | Mechanism                                                                                                                                                                                                                                                                                                                                                                                                                                                                                                                                                                      | Severity                                                                                                                                                        |
|--------------------|-------------------------------------------------------------------------------------------------------------------------------------------------------------------------------------------------------------------------------------------------------------------------------------------|---------------------------------------------------------------------------------------------------------------------------------------------------------------------------------------|--------------------------------------------------------------------------------------------------------------------------------------------------------------------------------------------------------------------------------------------------------------------------------------------------------------------------------------------------------------------------------------------------------------------------------------------------------------------------------------------------------------------------------------------------------------------------------|-----------------------------------------------------------------------------------------------------------------------------------------------------------------|
| Alexander et al.   | Exostosis                                                                                                                                                                                                                                                                                 | Ear                                                                                                                                                                                   | -                                                                                                                                                                                                                                                                                                                                                                                                                                                                                                                                                                              | Grade 0 (100% patency) = 95 (46%)<br>Grade 1 (66-99% patency) = 47 (23%)<br>Grade 2 (33-65% patency) = 34 (16%)<br>Grade 3 (<33% patency) = 31 (15%)            |
| Altuna et al.      | Exostosis                                                                                                                                                                                                                                                                                 | Ear                                                                                                                                                                                   | -                                                                                                                                                                                                                                                                                                                                                                                                                                                                                                                                                                              | First group (<25%) = 16 surfers<br>Second group (25-50%) = 19 surfers<br>Third group (50-75%) = 8 surfers<br>Fourth group (75-100%) = 3 surfers                 |
| Attlmayr & Smith   | Exostosis                                                                                                                                                                                                                                                                                 | Ear                                                                                                                                                                                   | -                                                                                                                                                                                                                                                                                                                                                                                                                                                                                                                                                                              | No Obstruction = 76 (36.19%)<br>Mild (<30% obstruction) = 70 (33.33%)<br>Moderate (30-60% obstruction) = 38 (18.10%)<br>Severe (>60% obstruction) = 26 (12.38%) |
| Bazanella et al.   | Chronic Low Back Pain                                                                                                                                                                                                                                                                     | Lower Back                                                                                                                                                                            | -                                                                                                                                                                                                                                                                                                                                                                                                                                                                                                                                                                              | -                                                                                                                                                               |
| Deleyiannis et al. | Exostosis                                                                                                                                                                                                                                                                                 | Ear                                                                                                                                                                                   | -                                                                                                                                                                                                                                                                                                                                                                                                                                                                                                                                                                              | Median scores (of both ears)<br><5yrs group = 7.5 obstruction<br>6-15yrs group = 63.0 obstruction<br>>15yrs group = 93.0 obstruction                            |
| Furness et al.     | Chronic Injuries of;<br>Joint origin (43.5%)<br>Muscular origin (23.6%)<br>Nerve origin (4.6%)<br>Skin (0.5%)<br>Bone origin (3.9%)<br>Unspecified (16.2%)<br>Non-musculoskeletal origin (7.7%) - auditory exostosis and otitis externa, and eye injuries including pterygium and abscess | Head/Face = 103<br>Neck = 121<br>Shoulder = 254<br>Elbow = 39<br>Wrist/Hand = 22<br>Thoracic = 55<br>Lower Back = 314<br>Hip/Groin = 70<br>Knee = 160<br>Shin/Calf = 10<br>Ankle = 66 | Prolonged paddling = 260 (21.1%) *<br>Turning manoeuvres = 182 (14.8%) **<br>Unknown = 142 (11.5%)<br>High-intensity paddling = 110 (8.9%) *<br>Stand-up phase = 76 (6.2%) **<br>Pushing down to stand up = 73 (5.9%) **<br>Keeping head up while paddling = 70 (5.7%) *<br>Prolonged environmental exposure = 68 (5.6%)<br>Prolonged lying on surfboard = 68 (5.6%)<br>Duck diving = 59 (4.8%)<br>Landing aerials = 31 (2.5%) **<br>Prolonged sitting on board = 29 (2.4%)<br>Tube riding = 24 (1.9%) **<br>Certain stances = 21 (1.7%) **<br>Trauma from wave = 18 (1.5%) ** | -                                                                                                                                                               |
| Inada et al.       | Chronic injuries or conditions of joint origin (100%)                                                                                                                                                                                                                                     | Lower Back (31%)<br>Shoulder (27%)<br>Lower Limbs (16%)                                                                                                                               | -                                                                                                                                                                                                                                                                                                                                                                                                                                                                                                                                                                              | -                                                                                                                                                               |

|                  |                                                                                          |                                                                                                                                                                                                 |                                                                                                              |                                                                                                                                                                                                                                                                |
|------------------|------------------------------------------------------------------------------------------|-------------------------------------------------------------------------------------------------------------------------------------------------------------------------------------------------|--------------------------------------------------------------------------------------------------------------|----------------------------------------------------------------------------------------------------------------------------------------------------------------------------------------------------------------------------------------------------------------|
|                  |                                                                                          | Head & Neck (15%)<br>Chest & Back (6%)<br>Forearm (5%)                                                                                                                                          |                                                                                                              |                                                                                                                                                                                                                                                                |
| Kroon et al.     | Exostosis                                                                                | Ear                                                                                                                                                                                             | -                                                                                                            | Normal (100% patency) = 125 (62%)<br>Mild (99-66% patency) = 53 (26%)<br>Moderate severe (<66% patency) = 24 (12%)                                                                                                                                             |
| Lennon et al.    | Exostosis                                                                                | Ear                                                                                                                                                                                             | -                                                                                                            | -                                                                                                                                                                                                                                                              |
| Lin et al.       | Pterygium                                                                                | Eye                                                                                                                                                                                             | -                                                                                                            | <u>Grade T1 (64.7%)</u><br>_Occasional = 4<br>_Recreational = 2<br>_Enthusiast = 5<br><u>Grade T2 (17.6%)</u><br>_Occasional = 0<br>_Recreational = 0<br>_Enthusiast = 3<br><u>Grade T3 (17.6%)</u><br>_Occasional = 1<br>_Recreational = 1<br>_Enthusiast = 1 |
| Lowdon et al.    | Sprain, Strain                                                                           | -                                                                                                                                                                                               | Overuse paddling = 26 (22%)<br>Stress from manoeuvre = 46 (39%)                                              | -                                                                                                                                                                                                                                                              |
| Lowdon et al.    | Sprain &/or Strain                                                                       | -                                                                                                                                                                                               | Overuse paddling = 20 (29%)<br>Stress from manoeuvre = 29 (42%)                                              | -                                                                                                                                                                                                                                                              |
| Nakanishi et al. | Exostosis                                                                                | Ear                                                                                                                                                                                             | -                                                                                                            | Grade 0 (no obstruction) = 150 (40.3%)<br>Grade 1 (<33% obstructed) = 118 (31.6%)<br>Grade 2 (33-66% obstruction) = 71 (19%)<br>Grade 3 (>66% obstruction) = 34 (9.1%)                                                                                         |
| Nathanson et al. | Overuse Syndromes (62%)<br>Environmental Exposure (18%)<br>Infection (15%)<br>Other (5%) | Shoulder (86)<br>Back (76)<br>Neck (43)<br>Knee (43)<br>Elbow (24)<br>Rib (14)<br>Other MSK (10)<br>Exostosis of ear (67)<br>Pterygium (19)<br>Otitis (33)<br>Cellulitis (29)<br>Sinusitis (10) | Overuse shoulder = 18%<br>Overuse back = 16%<br>Overuse neck = 9%<br>Overuse knee = 9%<br>Overuse elbow = 5% | -                                                                                                                                                                                                                                                              |

|                |                                                                          |                                                                                                                                                                                         |                                                                                                                                                                                                                                                                                                                                                                                                                                                                                             |                                                                                                                                                                      |
|----------------|--------------------------------------------------------------------------|-----------------------------------------------------------------------------------------------------------------------------------------------------------------------------------------|---------------------------------------------------------------------------------------------------------------------------------------------------------------------------------------------------------------------------------------------------------------------------------------------------------------------------------------------------------------------------------------------------------------------------------------------------------------------------------------------|----------------------------------------------------------------------------------------------------------------------------------------------------------------------|
|                |                                                                          | Other (23)                                                                                                                                                                              |                                                                                                                                                                                                                                                                                                                                                                                                                                                                                             |                                                                                                                                                                      |
| Remnant et al. | Gradual-onset surfing-related injuries in the preceding 12 months        | Shoulder (146)<br>Lower back (115)<br>Neck (104)<br>Knee (36)<br>Head and Face (35)<br>Upper Back (34)<br>Arm (24)<br>Ribs and Sternum (21)<br>Hip and Groin (21)<br>Leg and Ankle (13) | Prolonged paddling = 222 (28%) *<br>Stand up phase = 84 (10%) **<br>Head up whilst paddling = 70 (9%) *<br>High intensity paddling = 67 (8%) *<br>Preforming manoeuvre = 65 (8%) **<br>Prolonged lying on surfboard = 59 (7%)<br>Duck diving = 37 (5%)<br>Environmental exposure = 24 (3%)<br>Prolonged sitting = 19 (2%)<br>Moving neck during manoeuvre = 16 (2%) **<br>Landing aerials = 13 (2%) **<br>Wipe outs = 12 (2%) **<br>Tube riding = 8 (1%) **<br>Unknown or other = 105 (13%) | -                                                                                                                                                                    |
| Simas et al.   | Exostosis                                                                | Ear                                                                                                                                                                                     | -                                                                                                                                                                                                                                                                                                                                                                                                                                                                                           | Grade 0 (0% obstructed) = 9 (41.3%)<br>Grade 1 (1-33% obstructed) = 7 (30.4%)<br>Grade 2 (34-66% obstructed) = 3 (10.9%)<br>Grade 3 (67-100% obstructed) = 4 (17.4%) |
| Simas et al.   | Exostosis                                                                | Ear                                                                                                                                                                                     | -                                                                                                                                                                                                                                                                                                                                                                                                                                                                                           | Bilateral = 293 (21.3%)<br>Unilateral = 104 (7.6%)                                                                                                                   |
| Taylor et al.  | Chronic health problems (Exostosis, Pterygium, Sinusitis & MSK injuries) | Ear (67)<br>Eye (7)<br>Neck & Back (29)<br>Shoulder (15)<br>Knee (12)<br>Elbow (1)<br>Muscle/joint pain (10)<br>Stiffness (4)<br>Sinusitis (1)                                          | -                                                                                                                                                                                                                                                                                                                                                                                                                                                                                           | -                                                                                                                                                                    |
| Umeda et al.   | Exostosis                                                                | Ear                                                                                                                                                                                     | -                                                                                                                                                                                                                                                                                                                                                                                                                                                                                           | Severe stenosis (0-5) unilaterally = 12<br>Severe stenosis (0-5) Bilaterally = 12<br>Normal to slight stenosis (6-10) = 37                                           |
| Wong et al.    | Exostosis                                                                | Ear                                                                                                                                                                                     | -                                                                                                                                                                                                                                                                                                                                                                                                                                                                                           | Normal (100% Patency) = 159 (26.5%)<br>Mild (99-66% Patency) = 239 (39.8%)<br>Moderate (65-33% Patency) = 104 (17.3%)<br>Severe (< 33% patency) = 98 (16.3%)         |

Key: \*Paddling, \*\* Riding wave
